# Supplementary material
Source: PubMed Central journal article supplement (PMC9212666)
Supplement: mmc1.pdf [file mmc1.pdf]

| Case Number | Manufacturer         | Case entry (date) | Age (years) | Sex    | Dose        | Date of symptoms | Interval between vaccine/symptoms (days) | Interval between symptoms/hospital admission (days) | Platelet lowest value | Dimer-d high value | Thrombosis topography        | Anti-PF4 Elisa | Functionl Platelet Activating Assay (with added PF4) | Desfecho   | Classificaçã o Brighton TTS | Experts Haematologists panel UK |
|-------------|----------------------|-------------------|-------------|--------|-------------|------------------|------------------------------------------|-----------------------------------------------------|-----------------------|--------------------|------------------------------|----------------|------------------------------------------------------|------------|-----------------------------|---------------------------------|
| 1           | AstraZeneca          | 2021-03-29        | 23          | Female | first dose  | 2021-03-27       | 0                                        | NA                                                  | 147.000               | 1.119              | Lungs                        | not detectable | not detectable                                       | Recovered  | Level 1                     | Possible                        |
| 2           | AstraZeneca /Fiocruz | 2021-05-05        | 35          | Female | first dose  | 2021-05-01       | 9                                        | 2                                                   | 20.000                | 16.000             | CVST + bleeding/ Limbs       | detectable     | NA                                                   | Death      | Level 1                     | Definite                        |
| 3           | AstraZeneca /Fiocruz | 2021-05-07        | 35          | Female | first dose  | 2021-04-30       | 7                                        | 6                                                   | 22.000                | 20.000             | Haemorrhagic stroke/placenta | detectable     | detectable                                           | Death      | Level 1                     | Definite                        |
| 4           | AstraZeneca /Fiocruz | 2021-05-15        | 56          | Male   | first dose  | 2021-05-08       | 4                                        | 0                                                   | 17.000                | 41.000             | CVST + bleeding/ limbs       | detectable     | detectable                                           | Death      | Level 1                     | Definite                        |
| 5           | AstraZeneca /Fiocruz | 2021-05-21        | 60          | Male   | first dose  | 2021-05-13       | 8                                        | 7                                                   | 24.000                | 32.070             | Haemorrhagic stroke          | detectable     | NA                                                   | Death      | Level 1                     | Probable                        |
| 6           | AstraZeneca /Fiocruz | 2021-05-28        | 63          | Female | first dose  | NA               | NA                                       | NA                                                  | 15.000                | 20.000             | Portal vein                  | NA             | NA                                                   | Recovered  | Level 1                     | Probable                        |
| 7           | AstraZeneca          | 2021-05-31        | 39          | Female | first dose  | 2021-05-29       | 7                                        | 3                                                   | 101.000               | 9.500              | CVST + bleeding              | detectable     | NA                                                   | Death      | Level 1                     | Definite                        |
| 8           | AstraZeneca /Fiocruz | 2021-05-31        | 63          | Male   | second dose | 2021-05-09       | 4                                        | 0                                                   | 125.300               | 32.070             | Lungs/limbs                  | not detectable | not detectable                                       | Recovered  | Level 1                     | Probable                        |
| 9           | AstraZeneca          | 2021-05-31        | 40          | Male   | first dose  | 2021-05-29       | 9                                        | 0                                                   | 28.000                | 40.800             | Coronary                     | not detectable | NA                                                   | Recovering | Level 1                     | Probable                        |
| 10          | AstraZeneca /Fiocruz | 2021-06-02        | 66          | Female | first dose  | 2021-05-08       | 11                                       | 4                                                   | 9.000                 | NA                 | Limbs/CVST + bleeding        | NA             | NA                                                   | Death      | Level 1                     | Possible                        |
| 11          | AstraZeneca /Fiocruz | 2021-06-07        | 34          | Female | first dose  | 2021-06-01       | 8                                        | 3                                                   | 38.000                | 95.160             | CVST + bleeding              | not detectable | NA                                                   | Death      | Level 1                     | Probable                        |
| 12          | AstraZeneca /Fiocruz | 2021-06-11        | 24          | Female | first dose  | 2021-05-28       | 7                                        | NA                                                  | 2.000                 | 11.400             | CVST                         | detectable     | NA                                                   | Recovered  | Level 1                     | Definite                        |
| 13          | AstraZeneca /Fiocruz | 2021-06-14        | 55          | Female | first dose  | 2021-05-23       | 11                                       | 0                                                   | 30.000                | 24.000             | Limbs/lungs                  | detectable     | NA                                                   | Recovered  | Level 1                     | Definite                        |
| 14          | AstraZeneca /Fiocruz | 2021-06-14        | 29          | Male   | first dose  | 2021-05-16       | 3                                        | 7                                                   | 58.000                | NA                 | Haemorrhagic stroke          | NA             | NA                                                   | Death      | Level 3                     | Improbable                      |
| 15          | AstraZeneca /Fiocruz | 2021-06-14        | 52          | Male   | first dose  | 2021-05-30       | 11                                       | 12                                                  | 23.000                | NA                 | Haemorrhagic stroke          | NA             | NA                                                   | Death      | Level 1                     | Possible                        |
| 16          | AstraZeneca /Fiocruz | 2021-06-28        | 45          | Female | first dose  | 2021-06-16       | 5                                        | NA                                                  | 75.000                | 6.958              | CVST                         | detectable     | detectable                                           | Recovered  | Level 1                     | Definite                        |

| Case Number | Manufacturer         | Case entry (date) | Age (years) | Sex    | Dose        | Date of symptoms | Interval between vaccine/symptoms (days) | Interval between symptoms/hospital admission (days) | Platelet lowest value | Dimer-d high value | Thrombosis topography           | Anti-PF4 Elisa | Functionl Platelet Activating Assay (with added PF4) | Desfecho   | Classificaçã o Brighton TTS | Experts Haematologists panel UK |
|-------------|----------------------|-------------------|-------------|--------|-------------|------------------|------------------------------------------|-----------------------------------------------------|-----------------------|--------------------|---------------------------------|----------------|------------------------------------------------------|------------|-----------------------------|---------------------------------|
| 17          | AstraZeneca /Fiocruz | 2021-07-16        | 46          | Female | first dose  | NA               | NA                                       | NA                                                  | 27.000                | 3.600              | Limbs                           | detectable     | NA                                                   | Recovered  | Level 1                     | Probable                        |
| 18          | AstraZeneca /Fiocruz | 2021-07-08        | 86          | Male   | second dose | 2021-06-04       | 3                                        | 10                                                  | 23.000                | 18.470             | Lungs, ischemic stroke          | NA             | NA                                                   | Death      | Level 1                     | Probable                        |
| 19          | AstraZeneca /Fiocruz | 2021-07-19        | 59          | Female | first dose  | 2021-04-17       | 7                                        | 6                                                   | 46.000                | NA                 | Limbs                           | NA             | NA                                                   | Recovered  | Level 1                     | Possible                        |
| 20          | AstraZeneca /Fiocruz | 2021-07-09        | 47          | Female | first dose  | 2021-06-30       | 8                                        | 4                                                   | 28.000                | NA                 | CVST +bleeding                  | NA             | NA                                                   | Death      | Level 1                     | Possible                        |
| 21          | AstraZeneca /Fiocruz | 2021-07-02        | 42          | Female | first dose  | 2021-06-11       | 14                                       | NA                                                  | 47.000                | 10.000             | Limbs                           | not detectable | not detectable                                       | Recovering | Level 1                     | Possible                        |
| 22          | AstraZeneca /Fiocruz | 2021-08-09        | 57          | Female | first dose  | 2021-06-26       | 11                                       | 2                                                   | 67.000                | 14.210             | Limbs/CVST                      | detectable     | NA                                                   | Recovered  | Level 1                     | Probable                        |
| 23          | AstraZeneca /Fiocruz | 2021-08-09        | 75          | Female | second dose | 2021-07-03       | 35                                       | 8                                                   | 79.000                | NA                 | Portal vein/ mesenteric vein    | not detectable | NA                                                   | Recovered  | Level 1                     | Possible                        |
| 24          | AstraZeneca /Fiocruz | 2021-08-13        | 33          | Male   | first dose  | 2021-07-22       | 0                                        | 12                                                  | 93.000                | 69.227             | CVST                            | detectable     | detectable                                           | Death      | Level 1                     | Definite                        |
| 25          | AstraZeneca /Fiocruz | 2021-08-13        | 37          | Female | first dose  | 2021-08-03       | 11                                       | 0                                                   | 19.000                | 122.858            | CVST + bleeding                 | detectable     | NA                                                   | Death      | Level 1                     | Definite                        |
| 26          | AstraZeneca /Fiocruz | 2021-06-09        | 35          | Female | first dose  | 2021-05-10       | 10                                       | 0                                                   | 15.000                | NA                 | Ischemic Stroke                 | NA             | NA                                                   | Death      | Level 1                     | Possible                        |
| 27          | AstraZeneca          | 2021-09-14        | 28          | Male   | first dose  | 2021-08-23       | 9                                        | NA                                                  | 113.000               | NA                 | hemorrhagic stroke              | detectable     | detectable                                           | Death      | Level 1                     | Possible                        |
| 28          | AstraZeneca          | 2021-09-24        | 28          | Female | first dose  | 2021-09-09       | 9                                        | 10                                                  | 86.000                | NA                 | splenic/ mesenteric vein        | detectable     | detectable                                           | Death      | Level 1                     | Probable                        |
| 29          | AstraZeneca /Fiocruz | 2021-08-31        | 38          | Male   | first dose  | 2021-08-01       | 10                                       | 0                                                   | 45.000                | NA                 | CVST + bleeding                 | detectable     | detectable                                           | Recovering | Level 1                     | Definite                        |
| 30          | AstraZeneca /Fiocruz | 2021-11-04        | NA          | Female | first dose  | 2021-08-20       | 8                                        | 2                                                   | 22.000                | 4.000              | Hemorrhagic Stroke              | detectable     | detectable                                           | Death      | Level 1                     | Probable                        |
| 31          | AstraZeneca /Fiocruz | 2021-08-20        | 36          | Male   | first dose  | 2021-07-31       | 10                                       | 7                                                   | 8.000                 | 115.000            | Portal/splenic/ mesenteric vein | NA             | NA                                                   | Death      | Level 1                     | Probable                        |

| Case Number | Manufacturer         | Case entry (date) | Age (years) | Sex    | Dose        | Date of symptoms | Interval between vaccine/symptoms (days) | Interval between symptoms/hospital admission (days) | Platelet lowest value | Dimer-d high value | Thrombosis topography | Anti-PF4 Elisa | Functionl Platelet Activating Assay (with added PF4) | Desfecho   | Classificaçã o Brighton TTS | Experts Haematologists panel UK |
|-------------|----------------------|-------------------|-------------|--------|-------------|------------------|------------------------------------------|-----------------------------------------------------|-----------------------|--------------------|-----------------------|----------------|------------------------------------------------------|------------|-----------------------------|---------------------------------|
| 32          | AstraZeneca /Fiocruz | 2021-11-04        | 23          | Female | second dose | 2021-08-30       | 5                                        | 0                                                   | 34.000                | 1.200              | Limbs                 | not detectable | not detectable                                       | NA         | Level 1                     | Possible                        |
| 33          | AstraZeneca /Fiocruz | 2021-11-04        | 58          | Male   | first dose  | 2021-06-10       | 0                                        | NA                                                  | 46.000                | 20.000             | Esplenic vein         | not detectable | not detectable                                       | NA         | Level 1                     | Possible                        |
| 34          | AstraZeneca /Fiocruz | 2021-11-04        | 44          | Male   | first dose  | 2021-06-02       | 0                                        | NA                                                  | 112.000               | 9.580              | Limbs                 | not detectable | not detectable                                       | Recovering | Level 1                     | Probable                        |
| 35          | AstraZeneca /Fiocruz | 2021-10-15        | 39          | Female | NA          | 2021-07-03       | NA                                       | 0                                                   | 62.000                | NA                 | Lungs                 | not detectable | not detectable                                       | Recovering | Level 1                     | Possible                        |
| 36          | AstraZeneca /Fiocruz | 2021-11-04        | 54          | Female | first dose  | 2021-07-12       | 37                                       | NA                                                  | 43.000                | 2.370              | Limbs                 | not detectable | not detectable                                       | Recovering | Level 1                     | Possible                        |
| 37          | Janssen              | 2021-07-14        | 42          | Male   | first dose  | 2021-07-07       | 8                                        | 8                                                   | 38.000                | 128.000            | CVST+bleeding         | detectable     | detectable                                           | Death      | Level 1                     | Definite                        |
| 38          | Janssen              | 2021-08-03        | 38          | Male   | first dose  | 2021-07-26       | 11                                       | 0                                                   | 10.000                | 71.272             | CVST+bleeding         | detectable     | detectable                                           | Death      | Level 1                     | Definite                        |
| 39          | Pfizer/Biontech      | 2021-08-25        | 37          | Female | first dose  | 2021-08-17       | 20                                       | 0                                                   | 30.000                | 4.625              | Limbs                 | not detectable | not detectable                                       | NA         | Level 1                     | Probable                        |

NA: not available

CVST: Central Venous Sinus Thrombosis
